# Supplementary material
Source: PubMed Central journal article supplement (PMC7178332)
Supplement: ao9b04475_si_001.pdf [file ao9b04475_si_001.pdf]

## Supplementary information

### **Microwave-Epoxy Assisted Hydrothermal Synthesis of CuO/ZnO Heterojunction: A Highly Versatile Route to Develop H<sub>2</sub>S Gas Sensor**

*Digambar Y. Nadargi,<sup>†</sup> Mohaseen S. Tamboli,<sup>§</sup> Santosh S. Patil,<sup>#</sup> Ramesh B. Dateer,<sup>‡</sup> Imtiaz S. Mulla,<sup>††</sup>, Hyosung Choi,<sup>§\*</sup> and Sharad S. Suryavanshi<sup>†\*\*</sup>*

<sup>†</sup>School of Physical Sciences, PAH Solapur University, Solapur-413255, (M.S.) India.

<sup>§</sup>Department of Chemistry and Research Institute for Convergence of Basic Sciences, Hanyang University, Seoul-04763, Republic of Korea.

<sup>#</sup>Department of Chemistry, Pohang University of Science and Technology (POSTECH), Pohang-37673 Republic of Korea.

<sup>‡</sup>Centre for Nano and Material Sciences, JAIN (Deemed-to-be-University), Jain Global Campus, Bangalore, Karnataka 562112, India.

<sup>††</sup>Former Emeritus Scientist (CSIR), Centre for Materials for Electronics Technology, Pune-411008, India.

**Email:** Prof. S. S. Suryavanshi ([sssuryavanshi@rediffmail.com](mailto:sssuryavanshi@rediffmail.com)),  
Prof. H. Choi, ([hschoi202@gmail.com](mailto:hschoi202@gmail.com))

**Table S1:** Gas sensing performance comparison between the developed CuO/ZnO nanocomposites with the state-of-art work in the similar field.

| # | Materials ratio         | Obtained morphology | Synthesis route       | Operating temperature (°C) | H <sub>2</sub> S Gas concentration (ppm) | Response     | Ref. No. |
|---|-------------------------|---------------------|-----------------------|----------------------------|------------------------------------------|--------------|----------|
| 1 | CuO:ZnO = 4:1 by vol. % | Nanoparticles       | Solvothermal          | 225                        | 2                                        | 1035 %       | 33       |
| 2 | CuO in ZnO = 3wt%       | Nanorods            | Two step-Hydrothermal | 100                        | 100                                      | 40 (Ra/Rg)   | 34       |
| 3 | CuO in ZnO = 0.02 mol%  | Hollow spheres      | hydrothermal          | 336                        | 5                                        | 13.3 (Ra/Rg) | 35       |

|   |                                             |                                           |                                               |     |     |              |                  |
|---|---------------------------------------------|-------------------------------------------|-----------------------------------------------|-----|-----|--------------|------------------|
| 4 | $[\text{Cu}^{2+}]/[\text{Zn}^{2+}] = 0.005$ | Honey comb template                       | colloidal template                            | 225 | 10  | 380%         | 36               |
| 5 | $[\text{Cu}^{2+}]/[\text{Zn}^{2+}] = 0.03$  | Nanofibres                                | Electrospinning                               | 150 | 10  | 4489 (Ra/Rg) | 37               |
| 6 | Cu 10 nm thickness coating on ZnO rods      | Nanorods                                  | Hydrothermal                                  | 200 | 10  | 40 (Ra/Rg)   | 38               |
| 7 | Cu/Zn = 5.76 : 18.77                        | Porous flower-like CuO/ZnO nanostructures | Hydrothermal                                  | 220 | 100 | 25 (Ra/Rg)   | 39               |
| 8 | Cu/ZnO = 2.5 mol%                           | Nanoparticles                             | Epoxide assisted<br>Microwave<br>Hydrothermal | 250 | 25  | 94.28%       | Present emphasis |

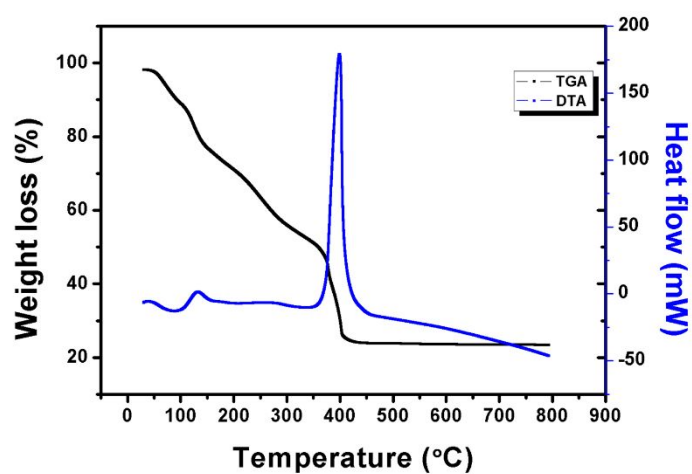

**Figure S1.** TG-DTA plot of sample ZC2 (2.5 mol% Cu doped ZnO)

### **Details of thixotropic paste formation and thereby thick films:**

The thixotropic paste was formulated by mixing the developed powder with a temporary binder (ethyl cellulose and butyl carbotyl acetate). The ratio of inorganic to organic part was kept at 70:30 vol ratio in formulating the paste. The paste was transferred to screen printing mesh and applied on alumina substrates using squeegee. The as prepared thick films were dried at room temperature and then sintered at 400°C for 1h in air to remove the binder content.

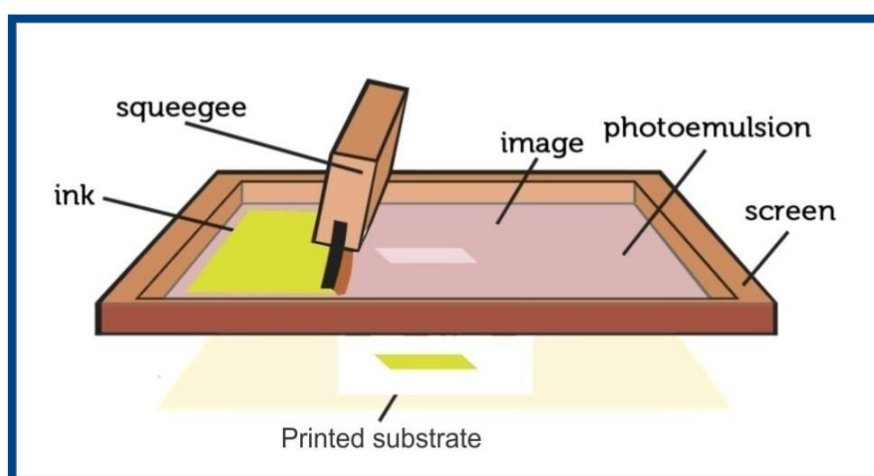

**Figure S2.** Schematic of screen printing technique

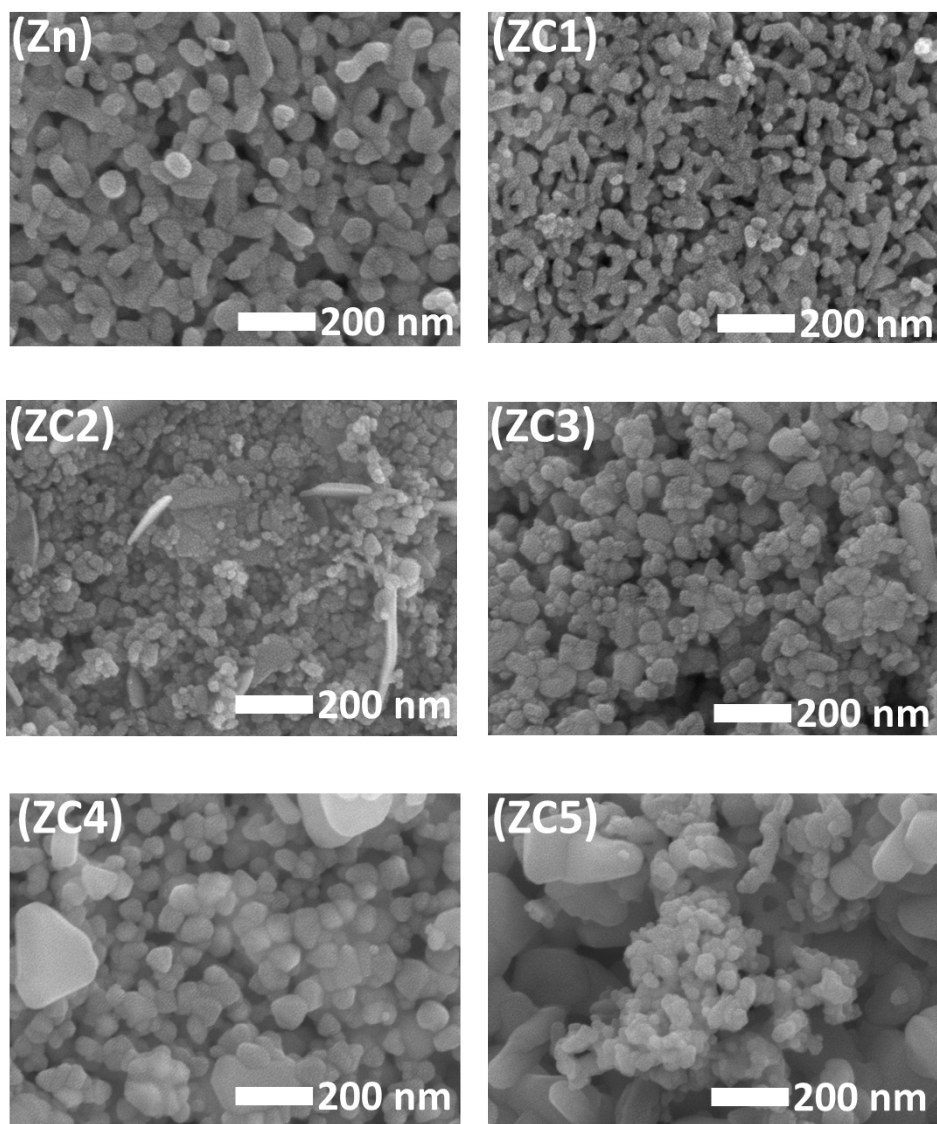

**Figure S3. SEM images of the samples at various Cu doping levels (Zn-Pristine ZnO, ZC1- 1.25 mol% Cu, ZC2- 2.5 mol% Cu, ZC3- 5mol% Cu, ZC4- 7.5 mol% Cu, ZC5- 10 mol% Cu)**

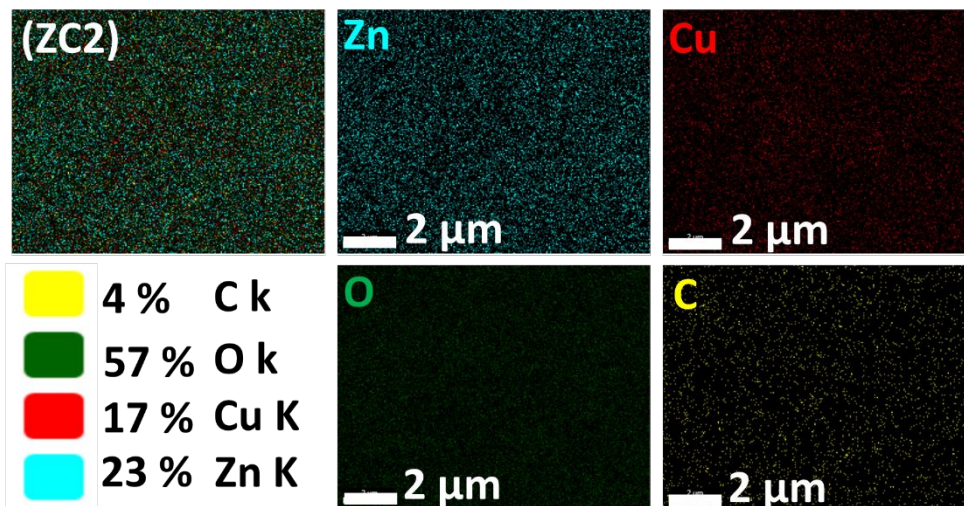

Figure S4. Elemental mapping of sample ZC2 (2.5 mol% Cu doped ZnO).

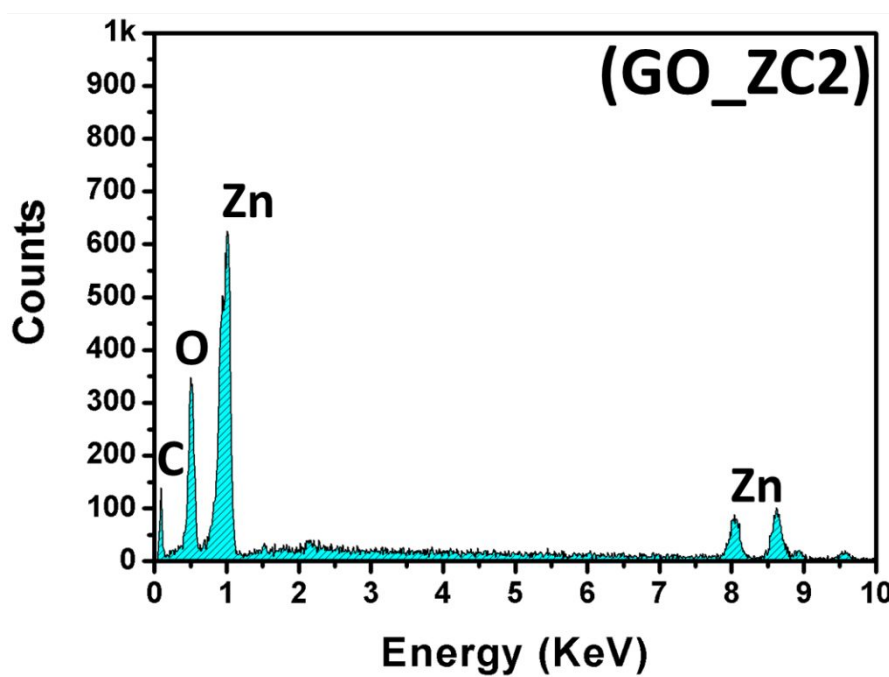

Figure S5. EDX spectra of sample ZC2 (2.5 mol% Cu doped ZnO).
